CORRECTION

# Correction: Bacterial assemblages on eggs reflect nesting strategies in wetland-associated birds

Wouter F. D. van Dongen, Hanja B. Brandl, Alžbeta Darolová, Ján Krištofík, Herbert Hoi

An additional affiliation is missing for the second author. Hanja B. Brandl is also affiliated with Department of Collective Behaviour, Max Planck Institute of Animal Behavior, Konstanz, Germany and Centre for the Advanced Study of Collective Behaviour, University of Konstanz, Konstanz, Germany.

## Reference

1. van Dongen WFD, Brandl HB, Darolová A, Krištofík J, Hoi H. Bacterial assemblages on eggs reflect nesting strategies in wetland-associated birds. PLoS One. 2025;20(9):e0332380. <https://doi.org/10.1371/journal.pone.0332380> PMID: [40961050](https://pubmed.ncbi.nlm.nih.gov/40961050/)

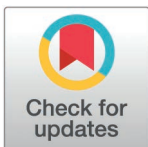

## OPEN ACCESS

**Citation:** van Dongen WFD, Brandl HB, Darolová A, Krištofík J, Hoi H (2026) Correction: Bacterial assemblages on eggs reflect nesting strategies in wetland-associated birds. PLoS One 21(1): e0341220. <https://doi.org/10.1371/journal.pone.0341220>

**Published:** January 20, 2026

**Copyright:** © 2026 van Dongen et al. This is an open access article distributed under the terms of the [Creative Commons Attribution License](https://creativecommons.org/licenses/by/4.0/), which permits unrestricted use, distribution, and reproduction in any medium, provided the original author and source are credited.
